# Supplementary material for: Putative virulence factors of Corynebacterium pseudotuberculosis FRC41: vaccine potential and protein expression
Source: PubMed Central journal article supplement (PMC4869379; doi:10.1186/s12934-016-0479-6), 2016-05-16
Supplement: 12934_2016_479_MOESM1_ESM.pdf [file 12934_2016_479_MOESM1_ESM.pdf]

| Homologous proteins in CMNR <sup>1</sup> microorganisms |                              |              |                        | Homologous proteins in Mammals <sup>2</sup> |                                            |              |                       |
|---------------------------------------------------------|------------------------------|--------------|------------------------|---------------------------------------------|--------------------------------------------|--------------|-----------------------|
| Organism                                                | Protein                      | Identity (%) | E-value                | Organism                                    | Protein                                    | Identity (%) | E-value               |
| <i>C. pseudotuberculosis</i> 1002                       | PknG                         | 100          | 0.0                    | <i>Ovis aries</i>                           | Uncharacterized Protein PRKX <sup>4</sup>  | 30           | 4.0x10 <sup>-12</sup> |
| <i>C. pseudotuberculosis</i> 258                        | PknG                         | 99           | 0.0                    | <i>Ovis aries</i>                           | Uncharacterized Protein CAMK1 <sup>5</sup> | 29           | 4.0x10 <sup>-12</sup> |
| <i>C. pseudotuberculosis</i> C231                       | PknG                         | 100          | 0.0                    | <i>Bos Taurus</i>                           | Uncharacterized Protein PRKX <sup>4</sup>  | 30           | 3.0x10 <sup>-12</sup> |
| <i>C. diphtheriae</i> HC02                              | PknG                         | 74           | 0.0                    | <i>Bos Taurus</i>                           | CAMK1 <sup>5</sup>                         | 29           | 1.0x10 <sup>-12</sup> |
| <i>C. glutamicum</i> ATCC 14067                         | S/T PK <sup>3</sup>          | 61           | 0.0                    | <i>Equus caballus</i>                       | Uncharacterized Protein CAMK1 <sup>5</sup> | 31           | 9.0x10 <sup>-13</sup> |
| <i>M. tuberculosis</i> SUMu007                          | PknG                         | 46           | 1.0x10 <sup>-169</sup> | <i>Mus musculus</i>                         | CAMK1 <sup>5</sup>                         | 29           | 3x10 <sup>-13</sup>   |
| <i>N. farcinica</i> IFM10152                            | Putative S/T PK <sup>3</sup> | 41           | 4.0x10 <sup>-173</sup> | <i>Mus musculus</i>                         | Smok2b <sup>6</sup>                        | 31           | 1x10 <sup>-13</sup>   |
| <i>R. pyridinivorans</i> SB3094                         | S/T PK <sup>3</sup>          | 46           | 1.0x10 <sup>-179</sup> | <i>Homo sapiens</i>                         | CAMK1 <sup>5</sup>                         | 29           | 2x10 <sup>-12</sup>   |

**Additional file 1:** NCBI BLASTP searches were performed in UniprotKB database. <sup>1</sup>*Corynebacterium, Mycobacterium, Nocardia,*

*Rhodococcus*; <sup>2</sup>*Ovis, Bos, Equus and Mus* genera, *Homo sapiens*; <sup>3</sup>S/T PK, serine/threonine protein kinase; <sup>4</sup>PRKX, protein kinase X-linked;

<sup>5</sup>CAMK1, Calcium/calmodulin-dependent protein kinase 1; <sup>6</sup>Smok2b, sperm motility kinase 2B.
