# Supplementary material for: Putative virulence factors of Corynebacterium pseudotuberculosis FRC41: vaccine potential and protein expression
Source: PubMed Central journal article supplement (PMC4869379; doi:10.1186/s12934-016-0479-6), 2016-05-16
Supplement: 12934_2016_479_MOESM2_ESM.pdf [file 12934_2016_479_MOESM2_ESM.pdf]

| SpaC homologous proteins in CMNR <sup>1</sup> microorganisms |                           |              |                       | SpaC homologous proteins in mammals <sup>2</sup> |                  |              |                    |
|--------------------------------------------------------------|---------------------------|--------------|-----------------------|--------------------------------------------------|------------------|--------------|--------------------|
| Organism                                                     | Protein                   | Identity (%) | E-value               | Organism                                         | Protein          | Identity (%) | E-value            |
| <i>C. pseudotuberculosis</i> 1002                            | Uncharacterized protein   | 99           | 0.0                   | No significant similarity found.                 |                  |              |                    |
| <i>C. pseudotuberculosis</i> C231                            | Uncharacterized protein   | 100          | 0.0                   |                                                  |                  |              |                    |
| <i>C. diphtheriae</i> HC02                                   | Putative fimbrial subunit | 27           | 5x10 <sup>-15</sup>   |                                                  |                  |              |                    |
| NanH homologous proteins in CMNR <sup>1</sup> microorganisms |                           |              |                       | NanH homologous proteins in mammals <sup>2</sup> |                  |              |                    |
| Organism                                                     | Protein                   | Identity (%) | E-value               | Organism                                         | Protein          | Identity (%) | E-value            |
| <i>C. pseudotuberculosis</i> 1002                            | NanH                      | 100          | 0.0                   | <i>Bos taurus</i>                                | Plectin          | 30%          | 1x10 <sup>-8</sup> |
| <i>C. pseudotuberculosis</i> C231                            | NanH                      | 100          | 0.0                   | <i>Mus musculus</i>                              | Plectin          | 30%          | 2x10 <sup>-8</sup> |
| <i>C. diphtheriae</i> HC02                                   | NanH                      | 50           | 0.0                   | <i>Homo sapiens</i>                              | Plectin          | 30%          | 2x10 <sup>-9</sup> |
| <i>C. glutamicum</i> ATCC 14067                              | Uncharacterized protein   | 36           | 1.0x10 <sup>-56</sup> | <i>Homo sapiens</i>                              | NEU <sup>3</sup> | 27%          | 2x10 <sup>-7</sup> |

**Additional file 2:** NCBI BLASTP searches were performed in UniprotKB database. <sup>1</sup>*Corynebacterium, Mycobacterium, Nocardia,*

*Rhodococcus;* <sup>2</sup>*Ovis, Bos, Equus and Mus* genera, *Homo sapiens;* <sup>3</sup>Sialidase 1 (lysosomal sialidase).
