# Supplementary material for: Putative virulence factors of Corynebacterium pseudotuberculosis FRC41: vaccine potential and protein expression
Source: PubMed Central journal article supplement (PMC4869379; doi:10.1186/s12934-016-0479-6), 2016-05-16
Supplement: 12934_2016_479_MOESM3_ESM.pdf [file 12934_2016_479_MOESM3_ESM.pdf]

| Homologous proteins in CMNR <sup>1</sup> microorganisms |         |              |                       | Homologous proteins in mammals <sup>2</sup> |         |              |                     |
|---------------------------------------------------------|---------|--------------|-----------------------|---------------------------------------------|---------|--------------|---------------------|
| Organism                                                | Protein | Identity (%) | E-value               | Organism                                    | Protein | Identity (%) | E-value             |
| <i>C. pseudotuberculosis</i> 1002                       | SodC    | 100          | 3x10 <sup>-122</sup>  | <i>Ovis aries</i>                           | Sod     | 36%          | 3x10 <sup>-15</sup> |
| <i>C. pseudotuberculosis</i> 258                        | SodC    | 100          | 3x 10 <sup>-122</sup> | <i>Bos taurus</i>                           | Sod1    | 34%          | 2x10 <sup>-15</sup> |
| <i>C. pseudotuberculosis</i> C231                       | SodC    | 100          | 3x10 <sup>-122</sup>  | <i>Equus caballus</i>                       | Sod1    | 32%          | 8x10 <sup>-15</sup> |
| <i>C. diphtheriae</i> HC02                              | SodC    | 68           | 2x10 <sup>-75</sup>   | <i>Mus musculus</i>                         | Sod1    | 34%          | 2x10 <sup>-16</sup> |
| <i>M. tuberculosis</i> SUMu007                          | SodC    | 43           | 9x10 <sup>-28</sup>   | <i>Homo sapiens</i>                         | Sod1    | 34%          | 3x10 <sup>-16</sup> |
| <i>N. farcinica</i> IFM 10152                           | SodC    | 44           | 4x10 <sup>-35</sup>   |                                             |         |              |                     |
| <i>Rhodococcus sp.</i> RHA1                             | SodC    | 49           | 2x10 <sup>-42</sup>   |                                             |         |              |                     |

**Additional file 3:** NCBI BLASTP searches were performed in UniprotKB database. <sup>1</sup>*Corynebacterium, Mycobacterium, Nocardia, Rhodococcus*; <sup>2</sup>*Ovis, Bos, Equus and Mus* genera, *Homo sapiens*.
