# Supplementary material for: Putative virulence factors of Corynebacterium pseudotuberculosis FRC41: vaccine potential and protein expression
Source: PubMed Central journal article supplement (PMC4869379; doi:10.1186/s12934-016-0479-6), 2016-05-16
Supplement: 12934_2016_479_MOESM4_ESM.pdf [file 12934_2016_479_MOESM4_ESM.pdf]

| <b>Target Protein</b> | <b>Mouse MHC II Allele</b> | <b>Epitope number</b> | <b>Peptide *</b> | <b>Core</b> | <b>1-log50k (aff)</b> | <b>Affinity (nM)</b> | <b>Rank (%)</b> | <b>Level of binding **</b> |
|-----------------------|----------------------------|-----------------------|------------------|-------------|-----------------------|----------------------|-----------------|----------------------------|
| PknG                  | H-2-IAb                    | 1                     | DGVYLPGIPSPDEEK  | YLPGIPSPD   | 0.6959                | 26.8                 | 0.20            | SB                         |
| SpaC                  | H-2-IAb                    | 1                     | LDEFKPVGARTPWVY  | FKPVGARTP   | 0.6740                | 34.0                 | 0.40            | SB                         |
| SpaC                  | H-2-IAb                    | 2                     | GLDEFKPVGARTPWV  | FKPVGARTP   | 0.6725                | 34.6                 | 0.40            | SB                         |
| SpaC                  | H-2-IAb                    | 3                     | TGLDEFKPVGARTPW  | FKPVGARTP   | 0.6615                | 39.0                 | 0.40            | SB                         |
| SpaC                  | H-2-IAb                    | 4                     | NTGLDEFKPVGARTP  | FKPVGARTP   | 0.6460                | 46.1                 | 0.50            | SB                         |
| SodC                  | H-2-IAb                    | 01                    | ADKAMTSAASTASNS  | AMTSAASTA   | 0.5721                | 102.5                | 1.50            | WB                         |
| SodC                  | H-2-IAb                    | 1                     | DKAMTSAASTASNSH  | MTSAASTAS   | 0.5604                | 116.3                | 2.00            | WB                         |
| SodC                  | H-2-IAb                    | 1.1                   | SADKAMTSAASTASN  | AMTSAASTA   | 0.5585                | 118.7                | 2.00            | WB                         |
| SodC                  | H-2-IAb                    | 1.2                   | DSADKAMTSAASTAS  | AMTSAASTA   | 0.5417                | 142.3                | 4.00            | WB                         |
| SodC                  | H-2-IAb                    | 2                     | KAMTSAASTASNSHA  | AMTSAASTA   | 0.5399                | 145.2                | 4.00            | WB                         |
| SodC                  | H-2-IAb                    | 3                     | AMTSAASTASNSHAF  | AMTSAASTA   | 0.4993                | 225.2                | 4.00            | WB                         |
| SodC                  | H-2-IAb                    | 3.1                   | KDSADKAMTSAASTA  | AMTSAASTA   | 0.4719                | 303.2                | 8.00            | WB                         |

|      |         |   |                 |           |        |       |      |    |
|------|---------|---|-----------------|-----------|--------|-------|------|----|
| SodC | H-2-IAb | 4 | MTSAASTASNSHAF  | SAASTASNS | 0.4372 | 440.9 | 8.00 | WB |
| NanH | H-2-IAb | 1 | NGLFDAAPPAPVARG | FDAAPPAPV | 0.7173 | 21.3  | 0.15 | SB |
| NanH | H-2-IAb | 2 | NNGLFDAAPPAPVAR | FDAAPPAPV | 0.7109 | 22.8  | 0.15 | SB |
| NanH | H-2-IAb | 3 | GLFDAAPPAPVARGA | FDAAPPAPV | 0.7108 | 22.8  | 0.15 | SB |
| NanH | H-2-IAb | 4 | DNNGLFDAAPPAPVA | FDAAPPAPV | 0.6956 | 26.9  | 0.20 | SB |
| NanH | H-2-IAb | 5 | LFDAAPPAPVARGAV | FDAAPPAPV | 0.6905 | 28.5  | 0.30 | SB |
| NanH | H-2-IAb | 6 | IDNGLFDAAPPAPV  | FDAAPPAPV | 0.6665 | 36.9  | 0.40 | SB |
| NanH | H-2-IAb | 7 | FDAAPPAPVARGAVG | FDAAPPAPV | 0.6587 | 40.1  | 0.40 | SB |
| PknG | H-2-IAd | 1 | TWLRQSRLEAAAADN | LRQSRLEAA | 0.5270 | 167.0 | 0.80 | WB |
| PknG | H-2-IAd | 2 | WLRQSRLEAAAADND | LRQSRLEAA | 0.5231 | 174.2 | 0.80 | WB |
| PknG | H-2-IAd | 3 | STHRRMAELTAILHL | RRMAELTAI | 0.5186 | 182.8 | 0.90 | WB |
| PknG | H-2-IAd | 4 | THRRMAELTAILHLI | RRMAELTAI | 0.5129 | 194.4 | 1.00 | WB |
| PknG | H-2-IAd | 5 | LTWLRQSRLEAAAAD | LRQSRLEAA | 0.5074 | 206.3 | 1.00 | WB |
| PknG | H-2-IAd | 6 | PRFLQIKIAIMNAAL | PRFLQIKIA | 0.5041 | 213.9 | 1.10 | WB |
| PknG | H-2-IAd | 7 | EPRFLQIKIAIMNAA | PRFLQIKIA | 0.4959 | 233.8 | 1.25 | WB |

|      |         |    |                  |           |        |       |      |    |
|------|---------|----|------------------|-----------|--------|-------|------|----|
| PknG | H-2-IAd | 8  | HRRMAELTAILHLIS  | RRMAELTAI | 0.4932 | 240.7 | 1.25 | WB |
| PknG | H-2-IAd | 9  | LRQSRLEAAAADNDL  | LRQSRLEAA | 0.4882 | 254.0 | 1.50 | WB |
| PknG | H-2-IAd | 10 | NEPRFLQIKIAIMNA  | PRFLQIKIA | 0.4690 | 312.8 | 2.00 | WB |
| PknG | H-2-IAd | 11 | NSTHRRMAELTAILH  | RRMAELTAI | 0.4672 | 319.0 | 2.00 | WB |
| PknG | H-2-IAd | 12 | ARSREKSISTFRSRR  | SREKSISTF | 0.4631 | 333.2 | 2.00 | WB |
| PknG | H-2-IAd | 13 | RSREKSISTFRSRRG  | SREKSISTF | 0.4540 | 367.9 | 4.00 | WB |
| PknG | H-2-IAd | 14 | RRMAELTAILHLISG  | RRMAELTAI | 0.4516 | 377.5 | 4.00 | WB |
| PknG | H-2-IAd | 15 | ALTWLRQSRLEAAAA  | LRQSRLEAA | 0.4504 | 382.6 | 4.00 | WB |
| PknG | H-2-IAd | 16 | EEVNAALPVPLLDRT  | NAALPVPLL | 0.4470 | 396.8 | 4.00 | WB |
| PknG | H-2-IAd | 17 | DARSREKSISTFRSR  | SREKSISTF | 0.4365 | 444.3 | 4.00 | WB |
| PknG | H-2-IAd | 18 | ANGMVTLFPFIPVSTA | NGMVTLPFI | 0.4365 | 444.7 | 4.00 | WB |
| PknG | H-2-IAd | 19 | SREKSISTFRSRRGT  | SREKSISTF | 0.4307 | 473.3 | 4.00 | WB |
| PknG | H-2-IAd | 20 | FANSKEIPLGVVRTL  | SKEIPLGVV | 0.4296 | 479.1 | 4.00 | WB |
| PknG | H-2-IAd | 21 | EVNAALPVPLLDRTD  | NAALPVPLL | 0.4274 | 490.6 | 4.00 | WB |
| SpaC | H-2-IAd | 1  | GKKNQEVQAADISVN  | KKNQEVQAA | 0.5410 | 143.4 | 0.60 | WB |

|      |         |    |                  |           |        |       |      |    |
|------|---------|----|------------------|-----------|--------|-------|------|----|
| SpaC | H-2-IAd | 2  | YGKKNQEVQAADISV  | KKNQEVQAA | 0.5306 | 160.6 | 0.70 | WB |
| SpaC | H-2-IAd | 3  | DYGKKNQEVQAADIS  | KKNQEVQAA | 0.5194 | 181.3 | 0.90 | WB |
| SpaC | H-2-IAd | 4  | KKNQEVQAADISVNG  | KKNQEVQAA | 0.5140 | 192.1 | 0.90 | WB |
| SpaC | H-2-IAd | 5  | GKADVTIDAASFPLS  | KADVTIDAA | 0.4886 | 253.0 | 1.50 | WB |
| SpaC | H-2-IAd | 6  | LFNSAKLKVGVSSEKT | SAKLVGVS  | 0.4774 | 285.4 | 2.00 | WB |
| SpaC | H-2-IAd | 7  | ADGKADVTIDAASFP  | KADVTIDAA | 0.4742 | 295.6 | 2.00 | WB |
| SpaC | H-2-IAd | 8  | FNSAKLVGVSSEKTS  | SAKLVGVS  | 0.4727 | 300.4 | 2.00 | WB |
| SpaC | H-2-IAd | 9  | DGKADVTIDAASFPL  | KADVTIDAA | 0.4710 | 306.0 | 2.00 | WB |
| SpaC | H-2-IAd | 10 | NSAKLVGVSSEKTSE  | SAKLVGVS  | 0.4699 | 309.7 | 2.00 | WB |
| SpaC | H-2-IAd | 11 | SAKLVGVSSEKTSEG  | SAKLVGVS  | 0.4591 | 348.2 | 4.00 | WB |
| SpaC | H-2-IAd | 12 | TADGKADVTIDAASF  | KADVTIDAA | 0.4439 | 410.5 | 4.00 | WB |
| SpaC | H-2-IAd | 13 | SDYGKKNQEVQAADI  | KKNQEVQAA | 0.4429 | 414.8 | 4.00 | WB |
| NanH | H-2-IAd | 1  | EAKSAAQDAIAAAEE  | SAAQDAIAA | 0.5294 | 162.6 | 0.70 | WB |
| NanH | H-2-IAd | 2  | AEAKSAAQDAIAAAE  | EAKSAAQDA | 0.5199 | 180.2 | 0.90 | WB |
| NanH | H-2-IAd | 3  | LAEQLAKVEAELANS  | LAKVEAELA | 0.5049 | 212.2 | 1.10 | WB |

---

|      |         |    |                 |           |        |       |      |    |
|------|---------|----|-----------------|-----------|--------|-------|------|----|
| NanH | H-2-IAd | 4  | AEQLAKVEAELANSQ | LAKVEAELA | 0.5028 | 216.8 | 1.10 | WB |
| NanH | H-2-IAd | 5  | ALAEQLAKVEAELAN | LAKVEAELA | 0.4935 | 239.9 | 1.25 | WB |
| NanH | H-2-IAd | 6  | AEAKEAAEIARKAAE | AAEIARKAA | 0.4933 | 240.5 | 1.25 | WB |
| NanH | H-2-IAd | 7  | LAEAKSAAQDAIAAA | EAKSAAQDA | 0.4901 | 249.0 | 1.50 | WB |
| NanH | H-2-IAd | 8  | AKSAAQDAIAAAEEA | AAQDAIAAA | 0.4774 | 285.7 | 2.00 | WB |
| NanH | H-2-IAd | 9  | LAEAKEAAEIARKAA | EAKEAAEIA | 0.4743 | 295.3 | 2.00 | WB |
| NanH | H-2-IAd | 10 | AKEAAEIARKAAEEA | AAEIARKAA | 0.4631 | 333.4 | 2.00 | WB |
| NanH | H-2-IAd | 11 | EQLAKVEAELANSQD | LAKVEAELA | 0.4620 | 337.2 | 4.00 | WB |
| NanH | H-2-IAd | 12 | EAKEAAEIARKAAEE | AAEIARKAA | 0.4599 | 344.9 | 4.00 | WB |
| NanH | H-2-IAd | 13 | QLAKVEAELANSQDQ | LAKVEAELA | 0.4536 | 369.5 | 4.00 | WB |
| NanH | H-2-IAd | 15 | KALAEQLAKVEAELA | LAKVEAELA | 0.4493 | 387.0 | 4.00 | WB |
| NanH | H-2-IAd | 16 | AAEIARKAAEEALKL | AAEIARKAA | 0.4404 | 426.0 | 4.00 | WB |
| NanH | H-2-IAd | 17 | KALAEAKEAAEIARK | KALAEAKEA | 0.4397 | 429.4 | 4.00 | WB |
| NanH | H-2-IAd | 18 | KSAAQDAIAAAEEAN | AAQDAIAAA | 0.4372 | 441.0 | 4.00 | WB |
| NanH | H-2-IAd | 20 | GATIEAEEAAMKAEN | GATIEAEEA | 0.4341 | 456.1 | 4.00 | WB |

|      |         |    |                 |           |        |       |      |    |
|------|---------|----|-----------------|-----------|--------|-------|------|----|
| NanH | H-2-IAd | 21 | EAAEIARKAAEEALK | AAEIARKAA | 0.4323 | 465.0 | 4.00 | WB |
|------|---------|----|-----------------|-----------|--------|-------|------|----|

---

**Additional file 4:** §Epitopes in signal peptide and conserved domains were discarded. \*Peptide length 15 mer. \*\*Strong binder (SB) threshold 50.00. Weak binder (WB) threshold 500.00.
