# Supplementary material for: Putative virulence factors of Corynebacterium pseudotuberculosis FRC41: vaccine potential and protein expression
Source: PubMed Central journal article supplement (PMC4869379; doi:10.1186/s12934-016-0479-6), 2016-05-16
Supplement: 12934_2016_479_MOESM5_ESM.pdf [file 12934_2016_479_MOESM5_ESM.pdf]

**Additional file 5:**

| <b>Cluster number</b> | <b>Number of epitopes in the cluster</b> | <b>Number of epitopes</b> | <b>Target-protein/epitope/number</b> | <b>Epitope sequence</b>                       |
|-----------------------|------------------------------------------|---------------------------|--------------------------------------|-----------------------------------------------|
| 1                     | 3                                        | 1                         | SpaC/MHC-I_H-2-Kb/13                 | VMGVLLVLV                                     |
|                       |                                          | 2                         | SpaC/MHC-I_H-2-Kd/7                  | IYLVMGVLL                                     |
|                       |                                          | 3                         | SpaC/B-cell/13                       | VRVGTLPKTGGHGVAIYLV                           |
| 2                     | 2                                        | 1                         | PknG/MHC-II_H-2-IAd/21               | EEVNAALPVPLLDRT                               |
|                       |                                          | 2                         | PknG/MHC-II_H-2-IAd/29               | EVNAALPVPLLDRTD                               |
| 3                     | 3                                        | 1                         | SpaC/MHC-I_H-2-Kd/5                  | AYNPKEGYI                                     |
|                       |                                          | 2                         | SpaC/MHC-I_H-2-Kd/4                  | IYAISQGRL                                     |
|                       |                                          | 3                         | SpaC/B-cell/3                        | AYNPKEGYIY AISQGRLKTLQSSK<br>LRIYDEDPNYPAGHLL |
| 4                     | 4                                        | 1                         | PknG/MHC-II_H-2-IAd/28               | FANSKEIPLGVVRTL                               |
|                       |                                          | 2                         | PknG/MHC-I_H-2-Db/11                 | FANSKEIPL                                     |
|                       |                                          | 3                         | PknG/B-cell/3                        | YAEPSQTLQTLRDAMAQEEFANS<br>KEIPL              |

---

|   |   |   |                        |                               |
|---|---|---|------------------------|-------------------------------|
|   |   | 4 | PknG/MHC-I_H-2-Kk/2    | EEFANSKEI                     |
|   |   | 1 | PknG/MHC-II_H-2-IAd/19 | RRMAELTAILHLISG               |
|   |   | 2 | PknG/MHC-II_H-2-IAd/8  | HRRMAELTAILHLIS               |
|   |   | 3 | PknG/MHC-II_H-2-IAd/4  | THRRMAELTAILHLI               |
| 5 | 7 | 4 | PknG/MHC-II_H-2-IAd/15 | NSTHRRMAELTAILH               |
|   |   | 5 | PknG/MHC-II_H-2-IAd/3  | STHRRMAELTAILHL               |
|   |   | 6 | PknG/B-cell/6          | QVPQNSTHRRMAELTAI             |
|   |   | 7 | PknG/MHC-I_H-2-Kb/10   | STHRRMAEL                     |
|   |   | 1 | SpaC/MHC-II_H-2-IAd/4  | KKNQEVQAADISVNG               |
|   |   | 2 | SpaC/MHC-II_H-2-IAd/1  | GKKNQEVQAADISVN               |
|   |   | 3 | SpaC/MHC-II_H-2-IAd/13 | SDYGKKNQEVQAADI               |
| 6 | 6 | 4 | SpaC/MHC-II_H-2-IAd/3  | DYGKKNQEVQAADIS               |
|   |   | 5 | SpaC/B-cell/9          | KLERLKVISDYGKKNQEVQAADI<br>SV |
|   |   | 6 | SpaC/MHC-II_H-2-IAd/2  | YGKKNQEVQAADISV               |
| 7 | 5 | 1 | PknG/MHC-II_H-2-IAd/24 | DARSREKSISTFRSR               |

---

---

|    |   |   |                        |                                      |
|----|---|---|------------------------|--------------------------------------|
|    |   | 2 | PknG/MHC-II_H-2-IAd/16 | ARSREKSISTFRSRR                      |
|    |   | 3 | PknG/MHC-II_H-2-IAd/27 | SREKSISTFRSRRGT                      |
|    |   | 4 | PknG/B-cell/1.1        | DTDTDARSREKSISTFRSRRGTNR<br>DDRTVANG |
|    |   | 5 | PknG/MHC-II_H-2-IAd/18 | RSREKSISTFRSRRG                      |
|    |   | 1 | PknG/MHC-II_H-2-IAd/14 | NEPRFLQIKIAIMNA                      |
| 8  | 4 | 2 | PknG/MHC-II_H-2-IAd/6  | PRFLQIKIAIMNAAL                      |
|    |   | 3 | PknG/MHC-II_H-2-IAd/7  | EPRFLQIKIAIMNAA                      |
|    |   | 4 | PknG/MHC-I_H-2-Db/3    | IAIMNAALT                            |
|    |   | 1 | NanH/MHC-II_H-2-IAd/23 | KSAAQDAIAAAEEAN                      |
|    |   | 2 | NanH/MHC-II_H-2-IAd/9  | AKSAAQDAIAAAEEA                      |
| 9  | 6 | 3 | NanH/MHC-II_H-2-IAd/1  | EAKSAAQDAIAAAEE                      |
|    |   | 4 | NanH/MHC-II_H-2-IAd/7  | LAEAKSAAQDAIAAA                      |
|    |   | 5 | NanH/B-cell/4          | AEAKSAAQDAI                          |
|    |   | 6 | NanH/MHC-II_H-2-IAd/2  | AEAKSAAQDAIAAAE                      |
| 10 | 6 | 1 | NanH/MHC-II_H-2-IAd/19 | KALAEQLAKVEELA                       |

---

---

|    |   |   |                        |                 |
|----|---|---|------------------------|-----------------|
|    |   | 2 | NanH/MHC-II_H-2-IAd/17 | QLAKVEAELANSQDQ |
|    |   | 3 | NanH/MHC-II_H-2-IAd/15 | EQLAKVEAELANSQD |
|    |   | 4 | NanH/MHC-II_H-2-IAd/5  | ALAEQLAKVEAELAN |
|    |   | 5 | NanH/MHC-II_H-2-IAd/3  | LAEQLAKVEAELANS |
|    |   | 6 | NanH/MHC-II_H-2-IAd/4  | AEQLAKVEAELANSQ |
|    |   | 1 | NanH/MHC-II_H-2-IAd/21 | AAEIARKAAEEALKL |
|    |   | 2 | NanH/MHC-II_H-2-IAd/27 | EAAEIARKAAEEALK |
|    |   | 3 | NanH/MHC-II_H-2-IAd/22 | KALAEAKEAAEIARK |
| 11 | 7 | 4 | NanH/MHC-II_H-2-IAd/6  | AEAKEAAEIARKAAE |
|    |   | 5 | NanH/MHC-II_H-2-IAd/10 | LAEAKEAAEIARKAA |
|    |   | 6 | NanH/MHC-II_H-2-IAd/14 | AKEAAEIARKAAEEA |
|    |   | 7 | NanH/MHC-II_H-2-IAd/16 | EAKEAAEIARKAAEE |
|    |   | 1 | SpaC/MHC-II_H-2-IAd/11 | SAKLVGVSEKTSEG  |
| 12 | 6 | 2 | SpaC/MHC-II_H-2-IAd/10 | NSAKLVGVSEKTSE  |
|    |   | 3 | SpaC/MHC-II_H-2-IAd/8  | FNSAKLVGVSEKTS  |

---

---

|    |   |   |                          |                               |
|----|---|---|--------------------------|-------------------------------|
|    |   | 4 | SpaC/MHC-II_H-2-IAd/6    | LFNSAKLKVGVSEKT               |
|    |   | 5 | SpaC/B-cell/10           | FGLFNSAKLKVGVSEKTSEGCAP<br>VR |
|    |   | 6 | SpaC/MHC-I_H-2-Db/1      | FGLFNSAKL                     |
|    |   | 1 | SpaC/MHC-II_H-2-IAb/4    | NTGLDEFKPVGARTP               |
|    |   | 2 | SpaC/MHC-II_H-2-IAb/3    | TGLDEFKPVGARTPW               |
| 13 | 5 | 3 | SpaC/MHC-II_H-2-IAb/1    | LDEFKPVGARTPWVY               |
|    |   | 4 | SpaC/MHC-II_H-2-IAb/2    | GLDEFKPVGARTPWV               |
|    |   | 5 | SpaC/MHC-I_H-2-Kb/3      | QSFNRNTGL                     |
|    |   | 1 | SodC/ MHC-II_H-2-IAb/01  | ADKAMTSAASTASNS               |
|    |   | 2 | SodC/ MHC-II_H-2-IAb/1   | DKAMTSAASTASNSH               |
|    |   | 3 | SodC/ MHC-II_H-2-IAb/1.1 | SADKAMTSAASTASN               |
| 14 | 8 | 4 | SodC/ MHC-II_H-2-IAb/1.2 | DSADKAMTSAASTAS               |
|    |   | 5 | SodC/ MHC-II_H-2-IAb/2   | KAMTSAASTASNSHA               |
|    |   | 6 | SodC/ MHC-II_H-2-IAb/3   | AMTSAASTASNSHAF               |
|    |   | 7 | SodC/ MHC-II_H-2-IAb/3.1 | KDSADKAMTSAASTA               |

---

---

|    |   |   |                        |                 |
|----|---|---|------------------------|-----------------|
|    |   | 8 | SodC/ MHC-II_H-2-IAb/4 | MTSAASTASNSHAF  |
|    |   | 1 | SpaC/MHC-II_H-2-IAd/12 | TADGKADVTDAAASF |
| 15 | 4 | 2 | SpaC/MHC-II_H-2-IAd/7  | ADGKADVTDAAAFP  |
|    |   | 3 | SpaC/MHC-II_H-2-IAd/5  | GKADVTDAAAFPLS  |
|    |   | 4 | SpaC/MHC-II_H-2-IAd/9  | DGKADVTDAAAFPL  |
|    |   | 1 | PknG/MHC-II_H-2-IAd/20 | ALTWLRQSRLEAAAA |
|    |   | 2 | PknG/MHC-I_H-2-Kb/7    | LTWLRQSRL       |
| 16 | 6 | 3 | PknG/MHC-II_H-2-IAd/5  | LTWLRQSRLEAAAAD |
|    |   | 4 | PknG/MHC-II_H-2-IAd/9  | LRQSRLEAAAADNDL |
|    |   | 5 | PknG/MHC-II_H-2-IAd/1  | TWLRQSRLEAAAADN |
|    |   | 6 | PknG/MHC-II_H-2-IAd/2  | WLRQSRLEAAAADND |
| 17 | 7 | 1 | NanH/MHC-II_H-2-IAb/6  | NNGLFDAAPPAPVAR |
|    |   | 2 | NanH/MHC-II_H-2-IAb/4  | NGLFDAAPPAPVARG |
|    |   | 3 | NanH/MHC-II_H-2-IAb/7  | GLFDAAPPAPVARGA |
|    |   | 4 | NanH/MHC-II_H-2-IAb/9  | DNNGLFDAAPPAPVA |

---

---

|    |   |   |                        |                                              |
|----|---|---|------------------------|----------------------------------------------|
|    |   | 5 | NanH/MHC-II_H-2-IAb/17 | IDNNGLFDAAPPAPV                              |
|    |   | 6 | NanH/MHC-II_H-2-IAb/19 | FDAAPPAPVARGAVG                              |
|    |   | 7 | NanH/MHC-II_H-2-IAb/10 | LFDAAPPAPVARGAV                              |
| 18 | 2 | 1 | PknG/B-cell/7          | LSESRIRRAARRLES IPTNEPRFLQI<br>KIA           |
|    |   | 2 | PknG/MHC-I_H-2-Dd/6    | SIPTNEPRF                                    |
| 19 | 2 | 1 | NanH/B-cell/2          | GEGKLPDPVTSEFF                               |
|    |   | 2 | NanH/MHC-I_H-2-Dd/2    | PDPVTSEFF                                    |
| 20 | 3 | 1 | SpaC/B-cell/7          | KATYKVTANQ SISNNEKCLQNTA<br>SIYAN            |
|    |   | 2 | SpaC/MHC-I_H-2-Db/8    | KCLQNTASI                                    |
|    |   | 3 | SpaC/MHC-I_H-2-Kd/11   | IYANEKDLI                                    |
| 21 | 2 | 1 | PknG/B-cell/2          | SPQRSTFGTKH MVFR TDQLIDGIE<br>RNV RITSEE VNA |
|    |   | 2 | PknG/MHC-I_H-2-Kd/9    | LYSPQRSTF                                    |
| 22 | 2 | 1 | PknG/MHC-I_H-2-Kk/12   | EEDDLSGLL                                    |
|    |   | 2 | PknG/B-cell/1          | MNDPLSRGTEAIP FDPFADDEEDD                    |

---

---

|    |   |   |                      |                                                |
|----|---|---|----------------------|------------------------------------------------|
|    |   |   |                      | LSGLLND                                        |
| 23 | 2 | 1 | PknG/B-cell/5        | LTKDPETLRFKALYL                                |
|    |   | 2 | PknG/MHC-I_H-2-Kb/5  | KALYLYALV                                      |
| 24 | 1 | 1 | NanH/B-cell/3        | IEDAKAATAKAEETAN                               |
| 25 | 1 | 1 | NanH/B-cell/7        | EKEKSGKAGGTDNTENKGFWE                          |
| 26 | 1 | 1 | SpaC/B-cell/6        | IVAKRKGPTSQNNDATSNG                            |
| 27 | 1 | 1 | NanH/MHC-I_H-2-Dd/5  | GGMQKLLAF                                      |
| 28 | 1 | 1 | NanH/MHC-I_H-2-Dd/3  | VDPAGQRCF                                      |
| 29 | 1 | 1 | NanH/MHC-I_H-2-Kk/4  | QELLRIFPG                                      |
| 30 | 1 | 1 | SodC/B-cell/1        | SSSTTTKDSADKAMTS                               |
| 31 | 1 | 1 | SpaC/B-cell/4        | NDYTSTGKTDSNYVWGI                              |
| 32 | 1 | 1 | PknG/MHC-I_H-2-Db/8  | TSLFLDDYV                                      |
| 33 | 1 | 1 | SpaC/B-cell/5        | KNSSNPAVLERIDVRDGSRKEFSL<br>DGVKDPLGQNVEKGIYGT |
| 34 | 1 | 1 | PknG/MHC-I_H-2-Kk/13 | LETQLFGIL                                      |
| 35 | 1 | 1 | SpaC/B-cell/2        | SQHTNRGETFNDRNSTDLYVQ                          |

---



---

|    |   |   |                        |                                           |
|----|---|---|------------------------|-------------------------------------------|
| 36 | 1 | 1 | NanH/MHC-II_H-2-IAd/26 | GATIEAEEAAMKAEN                           |
| 37 | 1 | 1 | NanH/B-cell/5          | KAENEAKALAE                               |
| 38 | 1 | 1 | NanH/B-cell/6          | SQDQAKALAEA                               |
| 39 | 1 | 1 | SpaC/MHC-I_H-2-Kd/6    | RYLVSNSSQ                                 |
| 40 | 1 | 1 | SpaC/MHC-I_H-2-Kb/12   | SWSLYRNQL                                 |
| 41 | 1 | 1 | NanH/B-cell/1          | MTDSHRRGTRKALVTLTA                        |
| 42 | 1 | 1 | SpaC/MHC-I_H-2-Db/9    | SGTHNLYTL                                 |
| 43 | 1 | 1 | PknG/MHC-I_H-2-Kd/1    | SYAEPSQTL                                 |
| 44 | 1 | 1 | PknG/B-cell/8          | DSLRLARSAPNVHHRYTLV                       |
| 45 | 1 | 1 | PknG/MHC-I_H-2-Ld/4    | LPGEAAPKL                                 |
| 46 | 1 | 1 | PknG/MHC-II_H-2-IAb/1  | DGVYLPGIPSPDEEK                           |
| 47 | 1 | 1 | PknG/B-cell/1.2        | STAEEMLKDDAYIEQKGLEKPLL<br>HPGD           |
| 48 | 1 | 1 | SpaC/B-cell/8          | GNGLRKVITYKIEVKNPKGFPETK<br>YSLTDTPQFADSV |
| 49 | 1 | 1 | PknG/MHC-II_H-2-IAd/25 | ANGMVTLPFIPVSTA                           |

---

---

|    |   |   |                      |                                 |
|----|---|---|----------------------|---------------------------------|
| 50 | 1 | 1 | NanH/MHC-I_H-2-Kb/6  | PIFSFLASI                       |
| 51 | 1 | 1 | PknG/B-cell/4        | EARSWLDTLDATLSDDWRHQWY<br>SGVTS |
| 52 | 1 | 1 | SpaC/B-cell/11       | QLKKVDAENKETELQATFE             |
| 53 | 1 | 1 | SpaC/B-cell/12       | PLSKSADQGKDPNLVIL               |
| 54 | 1 | 1 | SpaC/MHC-I_H-2-Dd/10 | VGPSVDPTV                       |
| 55 | 1 | 1 | SpaC/B-cell/1        | MEVPEKTKVEIRFQTGSKISTPSTP<br>SV |
| 56 | 1 | 1 | SpaC/MHC-I_H-2-Kk/2  | EEFENTEPI                       |
| 57 | 1 | 1 | NanH/MHC-I_H-2-Kk/1  | SEFFDSKVI                       |

---
